# Supplementary material for: The cylindromatosis gene product, CYLD, interacts with MIB2 to regulate Notch signalling
Source: PubMed Central journal article supplement (PMC4322962; doi:10.18632/oncotarget.2573), 2014-11-03
Supplement: oncotarget-05-12126-s001.pdf [file oncotarget-05-12126-s001.pdf]

**SUPPLEMENTARY INFORMATION,  
TABLE AND FIGURES**

Supplementary Table 1 Identification of MIB2 - CYLD co-precipitation by in-gel tryptic digest and tandem MS analysis:, ProFound Search Engine,

Rank 1 Candidate, Accession AAH16490.1 (Uniprot Q96AX9-11;NP\_543151.2), ‘MIB2 Protein’, Measured Peptides: 75, Matched peptides: 12, Minimum sequence coverage: 13%, Probability: 0.81. Peptides identified in the table are shown highlighted in gray within the MIB2 FASTA sequence below the table.

**Supplementary Table S1. List of proteomic hits identified from mass spectrometric data.** Identification of MIB2 - CYLD co-precipitation by in-gel tryptic digest and tandem MS analysis:, ProFound Search Engine, Rank 1 Candidate, Accession AAH16490.1 (NP\_543151.2), ‘MIB2 Protein’, Measured Peptides: 75, Matched peptides: 12, Minimum sequence coverage: 13%, Probability: 0.81.

| Measured Mass <sub>Av</sub> | Calculated Mass | Residues | Missed Cuts | Peptide Sequence                     |
|-----------------------------|-----------------|----------|-------------|--------------------------------------|
| 868.604                     | 868.524         | 17–24    | 1           | VAPRSLAR                             |
| 899.558                     | 899.518         | 698–705  | 1           | ARQLVDAK                             |
| 927.556                     | 927.499         | 61–68    | 1           | RATGRPDR                             |
| 1010.602                    | 1010.587        | 315–323  | 0           | LGKPAELQR                            |
| 1027.595                    | 1027.529        | 847–856  | 0           | SPLDLAAEGR                           |
| 1089.584                    | 1089.534        | 21–30    | 1           | SLARCGPSSR                           |
| 1114.631                    | 1114.634        | 411–420  | 1           | VIGDLDTVKR                           |
| 1210.788                    | 1210.703        | 511–522  | 0           | LVVEVALGNAAR                         |
| 1282.714                    | 1282.735        | 723–733  | 1           | EVAQILIREGR                          |
| 1461.768                    | 1461.703        | 361–373  | 0           | MAEFIGQTGTVHR *                      |
| 1844.129                    | 1843.953        | 949–967  | 0           | LRPDGSEVASAAPAGPPR                   |
| 2224.963                    | 2225.031        | 69–89    | 1           | SRAAPPNMDPDPQAGVQVGMR**              |
|                             |                 |          |             | *(1)+ oxidised M, ** (2)+ oxidised M |

**MIB2 (Uniprot Q96AX9–11)**

MAGALRRGRALGSRPSGPTVSSRRSPQCPVAQEGLGARSR PRVAPRSLAR CGPSSRLMGWKPSEARGQSQSFQ ASGLQPRSLKAARRATGRPDR|SRAAPPNMDPDPQAGVQVGMRVVRGVDWNWGQDGGEGGVGTVELGRHGS PSTPDRTVVVQWDQGTRTNRYRAGYQGAHDLLEYDNAQIGVRHPNIICDCKKHGLRGMRWKCRVCLDYDLCTQC YMHNKHELAAHAFDRYETAHSRPVTLSPRQGLPRIPLRGIFQGAKVVRGPDWEWGSQDGGEGKPRVVDIRGWDVE TGRSVASVTWADGTTNVYRVGHKGVKVDLKCVEAAGGFYKDHLPRLGKPAELQRRVSADSQPFQHGDKVKCLLD TDVLRMQEGHGGWNPRMAEFIGQTGTVHRITDRGDVVRVQFNHETRWFHPGALTKHHSFVWGDVVRVIGDLDTV KRLQAGHGEWTDDMAPALGRVGKVVKVFVDGNLRVAVAGQRWTFSPSCLVAYRPEEDANLDAERARENKSSLSV ALDKLRAQKSDPEHPGRLVVEVALGNAARALDLLRRRPEQVDTKNQGRALQVAAYLGQVELIRLLLQARAGVDL PDDEGNTALHYAALGNQPEATRVLSSAGCRADAINSTQSTALHVAVQRFLEVVRLCERGCNVNLPDAHSDTPLHS AISAGTGASGIVEVLTEVPNIDVTATNSQGFTLLHHSALKGHALAVRKILARARQLVDAK KEDGFTALHLAALNNHRE VAQILIREGRCDVNVRNRKLSPLHLAVQAHVGLVPLLDAGCSVNAEDEEGDTALHVALQRHQLLPLVADGAGG DPGPLQLLSRLQASGLPGSAELTVGAAVACFLALEGADVSYTNHRGRSPLDLAAEGRVLKALQGCAQFRERQAGG GAAPGPRQTLGTPNTVTNLHVGAAPGPEAAECLVSELALLVLFSPCQHRTVCEECARRMCKCIRCQVVVSKKLRP DGSEVASAAPAGPPRQLVEELQSRYRQMEERITCPICIDSHIRLVFQCGHGACAPCGSALSACPICRQPIRDRIQIFV

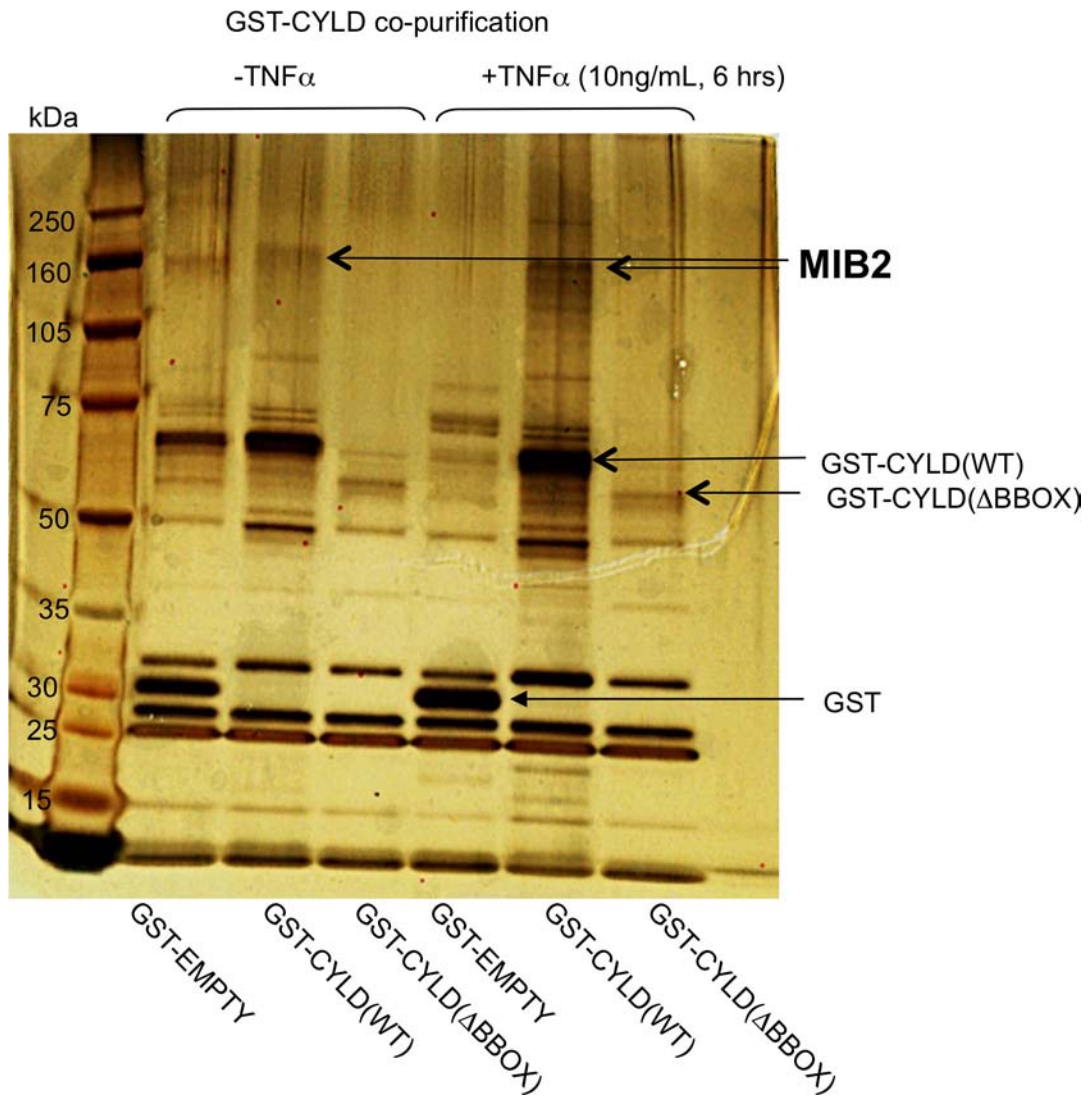

**Supplementary Figure S1: GST pulldown assays performed in the presence and absence of TNF-alpha.** MIB2 (arrowed) interacts with full length CYLD (GST-CYLD(WT)) in GST pull down assays, carried out both in the absence and presence of TNF-alpha. A CYLD construct mutated such that it did not contain a B Box domain (GST-CYLD( $\Delta$ BBOX)) [38], was also expressed in cells both in the presence and absence of TNF-alpha.

## HEY 1 expression in CYLD defective tumours

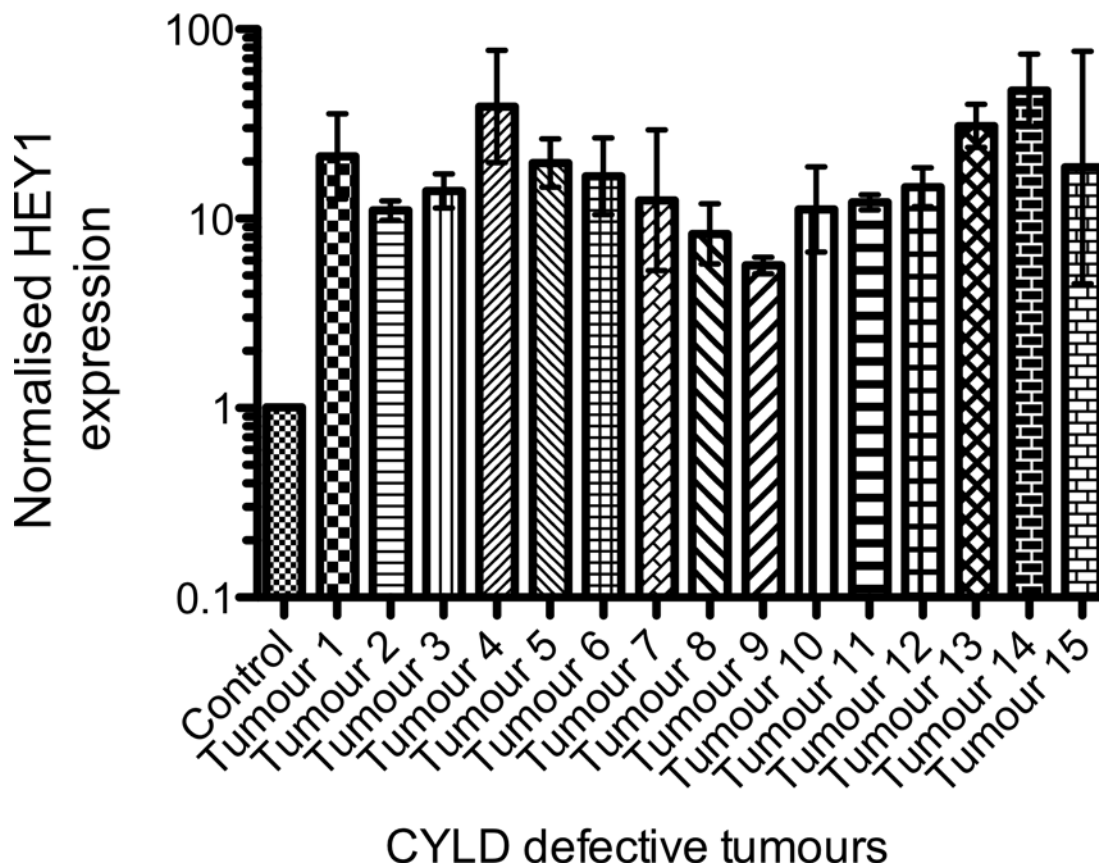

**Supplementary Figure S2: HEY1 expression in CYLD defective tumours.** Increased expression of HEY1 transcript was demonstrated in 15 CYLD defective tumours. RNA was extracted from microdissected, snap-frozen tumour tissue and subject to quantitative PCR using probes for HEY1. Beta-actin expression was also assessed and used to normalise expression levels. Differential expression was calculated using the  $2^{-\Delta\Delta C_t}$  formula.
